1 **Good communication is critical to supporting people living and working with a rare disease:**  
2 **current rare disease support perceived as inadequate.**

3

#### 4 **Authors**

5 Julie McMullan <sup>1\*</sup>, Ashleen L. Crowe<sup>1</sup>, Caitlin Bailie<sup>1</sup>, Kerry Moore<sup>2</sup>, Lauren S. McMullan <sup>1</sup>, Nahid

6 Shamandi<sup>1</sup>, Helen McAneney<sup>1</sup>, Amy Jayne McKnight <sup>1</sup>

7

8

#### 9 **Institutional addresses**

10 <sup>1</sup> Centre for Public Health, School of Medicine Dentistry and Biomedical Sciences, Institute of Clinical  
11 Science Block A, Grosvenor Road, Belfast, BT12 6BA.

12

13 <sup>2</sup> Northern Ireland Rare Disease Partnership, 2 William Street, Newtownards, BT23 4AH

14

#### 15 **\* Corresponding author**

16 Julie McMullan

17 Email: [raredisease@qub.ac.uk](mailto:raredisease@qub.ac.uk)

18

#### 19 **Abstract**

20

##### 21 *Background*

22 Many people living and working with rare diseases describe consistent difficulties accessing appropriate  
23 information and support. In this study an evaluation of the awareness of rare diseases, alongside  
24 related information and educational resources available for patients, their families and healthcare  
25 professionals, was conducted in 2018-2019 using an online survey and semi-structured interviews with  
26 rare disease collaborative groups (charities, voluntary and community groups) active across Northern  
27 Ireland (NI).

28

##### 29 *Results*

**NOTE: This preprint reports new research that has not been certified by peer review and should not be used to guide clinical practice.**

30 Ninety-nine participants engaged with the survey with 31 respondents providing detailed answers.  
31 Resources such as information, communication, 'registries', online services, training and improvements  
32 to support services were queried. Excellent communication is an important factor in delivering good  
33 rare disease support. Training for health professionals was also highlighted as an essential element of  
34 improving support for those with a rare disease to ensure they approach people with these unique and  
35 challenging diseases in an appropriate way. Carers were mentioned several times throughout the  
36 study; it is often felt they are overlooked in rare disease research and more support should be in place  
37 for them. Current care/support for those with a rare disease was highlighted as inadequate. Nine  
38 semi-structured interviews were conducted with rare disease collaborative groups. Reoccurring themes  
39 included a need for more effective: information and communication, training for health professionals,  
40 online presence, support for carers, and involvement in research.

41

#### 42 *Conclusions*

43 All rare disease collaborative groups agreed that current services for people living and working with a  
44 rare disease are not adequate. An important finding to consider in future research within the rare  
45 disease field is the inclusion of carers perceptions and experiences in studies. Due to the unique role  
46 a carer has in the life of a person with a rare disease it is vital that their voice is heard and their needs  
47 are listened to. This research provides insight into the support available for rare diseases across  
48 Northern Ireland, highlights unmet needs in service provision, and suggests approaches to improve  
49 rare disease support prioritising improved information and communication provision, improved access  
50 to services, and tailored support for carers of people with a rare disease.

51

#### 52 *Keywords*

53 Collaboratives groups; communication; Northern Ireland; online; rare disease semi-structured interview;  
54 social media; support; survey

55

#### 56 **Background**

57 In Europe, diseases that affect less than 1 in 2000 individuals are considered 'rare' [1]. Collectively  
58 rare diseases are a major public health issue affecting approximately 300 million people globally and  
59 ~110,000 individuals across Northern Ireland (NI) [2, 3]. The role of healthcare professionals is made

60 more difficult when supporting those with a rare disease due to the limited number of patients with  
61 each condition, scarcity of knowledge, uniqueness and complex care of needs [2, 3]. The UK strategy  
62 for Rare Diseases emphasised the need for improvement of the coordination of care, diagnosis,  
63 treatment and patient empowerment aiming to '*improve the lives of all those with rare diseases in the*  
64 *UK*' [4, 5].

65  
66 Many people living and working with rare diseases struggle to access appropriate health and social  
67 care, source useful information, or participate in research [2, 6-10]. There is often a lack of appropriate  
68 health services, skilled health professionals and effective treatment options [11]. Alongside multiple  
69 medical issues that are often associated with a rare disease, it is common for patients, families, and  
70 carers to experience psychological stress, loneliness, tiredness, discouragement, unemployment, lack  
71 of information and difficulty accessing appropriate health care [11]. This is often made worse by a lack  
72 of appropriate peer and community support services [12].

73  
74 Health and social care professionals frequently experience frustration and distress when caring for  
75 individuals with a rare disease as they pose distinct challenges to clinicians working in primary,  
76 secondary and tertiary health care settings [13]. Difficulties with diagnosis and management often stem  
77 from lack of knowledge, lack of evidence-based information or difficulty accessing information [7, 14,  
78 15]. Because there are approximately 8000 rare diseases, it is unrealistic to provide training for health  
79 professionals on every disease [11]. The internet is increasingly used as a source of information and  
80 support by families affected by rare disease as a way of gaining information and connecting with others  
81 [16].

82  
83 It has been found that individuals and families affected by a rare disease can benefit greatly from peer  
84 support from those facing similar challenges, yet the majority of rare diseases do not have a dedicated  
85 support group [17]. Many generic resources exist which can be useful for those living with a rare  
86 disease, for example, Global Gene, Rare Disease UK and locally the Northern Ireland Rare Disease  
87 Partnership [18-20]. It is interesting to note the difference between the support available for those with  
88 a rare disease compared to those with other conditions. For example, those with cancer or heart  
89 conditions have access to a wide range of support [21, 22] which receive much greater national funding

90 support than rare disease charities. Gaining an insight into the services rare disease collaborative  
91 groups provide and identifying the main services available could be of great benefit to those with a rare  
92 disease. Effectively signposting individuals to the most appropriate services would reduce the endless  
93 hours of internet searching often undertaken by those with a rare disease and their families. Being  
94 aware of the services on offer would also reduce the chance of services being replicated needlessly as  
95 well as identifying any gaps in services.

96

97 In this study, an evaluation was conducted of the awareness of rare diseases, related information, and  
98 educational resources available for patients, their families and healthcare professionals across Northern  
99 Ireland. Additionally, there was a focus on how collaborative groups use social media in relation to rare  
100 disease(s). An online survey and individual interviews were conducted with representatives from rare  
101 disease collaborative support groups as part of the evaluation phase of key priorities for action in the  
102 Northern Ireland Rare Diseases Implementation Plan [5].

103

## 104 **Results**

### 105 **Survey**

106 Ninety-nine respondents participated in the survey with 31 respondents providing detailed answers to  
107 questions. The template survey is provided Additional file 1.

108

### 109 Collaborative group characteristics

110 The survey was open to all charities, voluntary and community groups providing services for people  
111 living and working with rare diseases across Northern Ireland and anyone from within the group was  
112 eligible to answer the survey. Detailed survey responses are provided in Additional file 2. Rare disease  
113 collaborative groups were named in the survey to ensure no overlap where multiple representatives  
114 may have responded on behalf of a single group; there was no overlap in group names for individual  
115 responses. All groups provided services to individuals living and working with rare diseases in Northern  
116 Ireland and were established between 1980s to 2017. The majority were registered charities in the UK,  
117 18% were based in Northern Ireland, two were registered in the Republic of Ireland and two were from  
118 the United States of America. Groups ranged from providing support in the last two years to more than  
119 50 years experience as a collaborative group. The majority of group representatives completing the

120 survey were White British (60%) or Irish (32%), over the age of 35 (84%), and identified as female  
121 (84%). 88% of respondents indicated they were willing to be contacted for follow-up by email, with only  
122 two preferring a telephone call.

123

#### 124 Communication

125 Ninety-two percent of groups provided or actively supported a facility to put individuals (for example  
126 health care professionals, patients, families, carers) in contact with each other on request. While only  
127 14% of groups offer a 24-hour helpline, 41% offer an office-based telephone helpline during the day  
128 with 86% of groups offering some form of contact-response option. Ninety-four percent of groups have  
129 a dedicated social media representative, while half of groups surveyed had a named information or  
130 communication manager, and 68% have a branch or contact person located in Northern Ireland. For  
131 many rare disease collaborative groups, improved resources to have 'better' helpline services were  
132 described as 'very important'.

133

134 As additional figure displays the supportive networking options provide by many groups to help connect  
135 people [see Additional file 3]. All groups were interested in collaborating with relevant groups to develop  
136 complementary information resources, with a particular focus on opportunities to improve information  
137 sharing between community/voluntary and statutory services.

138

139 Only one of the groups surveyed does not have a website, the remainder described their website as  
140 benefitting anyone affected by a rare disease or is worried about a loved one. Groups differed in terms  
141 of when websites were updated, with just four groups providing daily updates and the majority (62%)  
142 *ad hoc* as new information is available and personnel resources permit. Two groups have information  
143 resources meeting NHS England's information standard [23], while two have information approved by  
144 medical advisors. A variety of social media platforms are used by the groups including Facebook,  
145 Twitter, YouTube, LinkedIn, Instagram and Snapchat. Uses of social media within the groups varies  
146 but include: sharing information about your specific rare disease (94%), raising public awareness of  
147 rare diseases (94%), promoting fundraising campaigns (88%), sharing information about upcoming  
148 events (83%), posting information about clinical trials (75%) and sharing recent news (75%). This  
149 information is displayed in Additional File 4. Eight groups provide daily updates to social media, with

150 four providing weekly updates, and the remainder updating on an *ad hoc* basis. Three of the groups  
151 surveyed do not use social media due to either lack of expertise, privacy concerns and constraints on  
152 time.

153

154 More detail on social media use by collaborative groups is provided in Additional file 5. 81.3% of groups  
155 strongly agree that social media use by rare diseases collaborative groups is beneficial for  
156 communication with and support for patients. The majority of those surveyed believed their group  
157 should expand its use of social media if time and budget were not issues to be considered. Suggestions  
158 made for expansion included: digest news and updates and share across all aspects of the condition,  
159 graphic design, educational and awareness raising videos and website development, a daily blog,  
160 advice for doctors, nurses, consultants and other health persons to aid understanding of rare conditions  
161 and how best to manage them.

162

#### 163 List of members and registry ideas

164 95% of groups surveyed hold a list of members with information including: name, address, contact  
165 details, type of disease, date of symptoms starting, date of diagnosis, living alone or with carer, family  
166 details, mutation types, resource for clinical trials and interest in volunteering. Many groups (36%)  
167 struggle with data protection issues in terms of extra work, keeping governance up-to-date, and  
168 maintaining contacts, particular those groups that are volunteer led. Although only eight groups hold a  
169 disease 'registry', with content ranging from simple names and contact details to information on  
170 emerging therapies and available clinical trials 77% indicated that they would like one whether held  
171 nationally or supported to host themselves. The majority of 'registries' were resourced from charitable  
172 funds, with one receiving government funding. The distribution of registry data is displayed in Additional  
173 file 6.

174

#### 175 Training

176 Forty-four percent of groups had developed/co-ordinated training modules for healthcare professionals.  
177 Thirty-eight percent of the groups organise training days for healthcare professionals in specific  
178 disciplines such as physiotherapists, occupational therapists, hospice staff; some also support  
179 members by organising unofficial talks and training for schools, teachers and families. Three groups

180 developed co-ordinated smartphone-based apps including an accident and emergency app for the  
181 community, a Patient Buddy app, with another under development.

182

### 183 Improving services for those with a rare disease

184 Various suggestions were made as to how information and communication for rare diseases could be  
185 improved inside and outside of the groups and can be viewed in Additional File 7.

186

187 When asked how groups would like those living with a rare disease in Northern Ireland to primarily  
188 interact with their information resources groups responded with channels such as social media, website,  
189 telephone. One group however said they would like live coverage of group meetings to enable them to  
190 join remotely. Groups expressed their desire for healthcare professionals to interact with the group's  
191 information resources by joining consortiums, pass on relevant leaflets, as well as the usual channels.  
192 Similar methods of communication were suggested for non-clinical professionals and for other groups.

193

### 194 **Interviews**

195 Nine semi-structured 1-1 interviews were conducted with rare disease collaborative groups based in  
196 Northern Ireland lasting 20-80 minutes. The interview participants were either in paid employment or a  
197 held a voluntary role within a rare disease support group. The duties of these individuals varied from  
198 supporting patients, holding meetings, organising conferences, advisory roles, signposting, advocacy  
199 and raising awareness. Half of the collaborative groups interviewed has a focus on a rare disease that  
200 is genetic although most participants acknowledged having a limited knowledge of genetics and relied  
201 on specialists to provide them with this information when required.

202

203 The enthusiasm the participants had for the collaborative group they volunteer/work for and the  
204 individuals they support was evident from the interviews. They were passionate when they spoke and  
205 often failed to recognise the amazing work they do and the difference they are making. Each person  
206 felt they would like to do more to help and put forward several suggestions for how care for rare disease  
207 patients might be improved.

208

209 The participants' identities have been protected by using the codes P1-P9, three of these participants  
210 also completed the survey. Thematic analysis [24] was used to analyse the data; six themes emerged.  
211 Findings from the interviews are outlined thematically below with direct quotes used for representative  
212 samples.

213

214 Theme 1: Excellent communication is key

215 This theme emerged from participants' views that effective communication around rare disease creates  
216 an understanding and improves care.

217

218 *...” communication, I always define it as creating understanding, that’s what it is,  
219 communication is the key to everything.” (P7)*

220

221 Throughout the interviews it became apparent that communication around rare disease involves  
222 several groups: those with a rare disease, carers, family members, health care professionals and the  
223 voluntary sector. With several collaborative groups working in Northern Ireland to support those with  
224 a rare disease, communication is vital to ensure that the work being carried out is complimentary and  
225 is an effective use of resources.

226

227 *...” you don’t want to duplicate the work either that somebody else has, so it’s that thing about  
228 networking and communication” (P3)*

229

230 The majority of the groups interviewed work with other rare disease groups and feel they have much to  
231 learn from one another. The groups provide links to other rare disease organisations via their website  
232 and find networking opportunities to be extremely useful, at times even raising their group’s profile.

233

234 *...”networking ... to try and map what research is going on and they all communicate with  
235 each other”. (P5)*

236

237 Most groups have a helpline that ranges from an answering service on a mobile phone to a 9 am – 5  
238 pm manned telephone. The helplines are mainly used for supporting those who are newly diagnosed



239 when they feel they have nowhere to turn or to signpost people to other means of help. Most groups  
240 reported that initial contact from rare disease patients was normally *via* social media or email rather  
241 than the phone line.

242

243 Difficulties were highlighted by many groups regarding meeting to communicate in person with someone  
244 living with a rare disease, for example at a conference or support group. This is thought to be due to  
245 the nature of the disease and geographical boundaries that can inhibit an individual's chance to attend.

246

247 *"Attendance at these meetings is very poor but that's the nature of the condition, you're either*  
248 *very ill and you can't get to the meeting or maybe you physically can't get to the meeting or*  
249 *you're well and you don't want to be reminded that you have this illness". (P2).*

250

251 *..." social media.... primary means of communication to the outside world." (P1)*

252

253 Theme 2: Online presence

254

255 *..." there's quite a lot of interaction between patients..." (P5)*

256

257 Several uses of social media were highlighted by the groups interviewed including: advertising surveys,  
258 links with other charities, research updates, highlighting events/fundraising and posting photos. The  
259 instantaneous benefits of social media were acknowledged by the groups. Managing the platforms and  
260 the possibility of missing individuals who do not use the internet were raised as concerns of using social  
261 media. Invaluable support and mentoring from those experiencing something similar was also referred  
262 to as a positive outcome of using social media in relation to rare disease. One group explained they  
263 sometimes have a professional on the Facebook page for an hour to take queries and then an  
264 administrator will upload the answers.

265

266 *..." when we have the questions and answers with the professionals very well, you know*  
267 *people have put aside that hour in their evening and they're willing to sit in and listen and put*  
268 *their questions..." (P3)*

269

270 A number of uses of the group's websites were highlighted including: making initial contact with the  
271 group, guidance and advice regarding clinical management, displaying factsheets of key symptoms;  
272 practical management; red flags; lists of the conditions which are considered rare so it is clear who the  
273 group can help, information about research; information for health professionals; information about the  
274 support groups; link to other forums; hub – local resources, generic information for example blue badge  
275 guidance, links to specific support within hospitals. For most groups the general aim to of the websites  
276 is to include content that will be relevant for anyone who has an interest in rare diseases whether newly  
277 diagnosed or wanting to know what is currently happening.

278

279 *...” Predominantly the reason is awareness raising but also to provide a point of contact so they*  
280 *can actually make contact...” (P7)*

281

282 *...”anybody who has any interest in rare disease issues will find something useful there whether*  
283 *it's someone who's recently been diagnosed and has no idea what's going on where to go or*  
284 *who to talk to or whether it's somebody who has a bit of an interest and wants to know what's*  
285 *happening with other people, what level of engagement there is”. (P6)*

286

### 287 Theme 3: Carers

288 Participants were asked directly during interview if they provide support for carers. Most groups said  
289 that although carers are welcome to attend events they organise, they do not host anything specifically  
290 for carers. The quote below illustrates this:

291

292 *“We're very, very conscious about carers or family members because they go through the*  
293 *same kind of disease or that the patients experience so we do, whenever we plan anything*  
294 *we always take into account family members and carers. I mean there's not a dedicated*  
295 *network for family members but it's something that we are looking into”. (P8)*

296

297 The participant below explained that carers are involved with such a highly intensive care routine that  
298 they struggle to find time to attend support groups.

299

300           ... “carers are really stretched, they don’t have a lot of free time, even if they wanted to come  
301           to support groups still there isn’t the respite care that will cover them....” (P5)

302

303   Other participants were in agreement that the needs of the carers are as important as the person with  
304   the rare disease and they should not be overlooked. One participant said that their group previously  
305   tried to organise a carers only workshop at a conference but it was unsuccessful. They stressed how  
306   they feel it is important for carers to get time away to allow them to off load and discuss any issues they  
307   are facing.

308

309           ...” I’d really like at times the carers just to talk without the patients there you know no harm to  
310           them or anything like that but we need to vent our issues.” (P2)

311

312   In most cases the groups stated that the initial contact with the group comes from a family member or  
313   a carer who are reaching out on behalf of the person they are caring for. This indicates the complex  
314   role and unique relationship that the person with the rare disease has with their carer.

315

#### 316   Theme 4: Training health professionals

317           “We do lots of training for health professionals. I would say probably at least every month we  
318           have a training session somewhere for health care professionals.” (P5)

319

320   More than half of the groups interviewed have involvement / training experiences with health  
321   professionals, those that do not said this is due to struggling to get professionals on board. The training  
322   discussed during interviews included teaching at Queen’s University, Belfast (QUB) presentations to  
323   health professionals, e-learning modules, questions and answers with health professionals on social  
324   media and encouraging health professionals to attend the conferences. One group explained that they  
325   usually have someone attending their clinic once a month and then they encourage them or even the  
326   genetic trainees to do the BMJ module relating to their specific disease.

327

328           ...” we contribute to medical education...” (P6)

329

330 *...” we have e-learning modules, the first 2 that were launched were for GPs and*  
331 *physiotherapists and they were really successful”... (P9)*

332

333 Another group said they provide a variety of training for health professionals, from large regional or  
334 national events with lots of multidisciplinary teams, to events on a much smaller scale with local teams.  
335 They also hold a health care professionals day each year to raise their awareness and help them to  
336 realise that although a rare disease is often considered ‘specialised’ the ongoing processes and  
337 problems it causes are transferable across lots of conditions and so the issue is about how you support  
338 the person as the emotional impact is the same. Another group felt that patients have the ‘*lived*  
339 *experience*’, therefore we can all learn from each other. They said that patients can lose confidence in  
340 the health service when they repeatedly hear, ‘*I’ve never heard of this*’.

341

#### 342 Theme 5: Involvement with research

343 Three of the groups interviewed have had involvement with research. One group recognised the fact  
344 that not everyone wants to know everything about their rare condition but that others are extremely  
345 interested in the latest research in their area and aim to know as much as they can about it.

346

347 *...”Twitter feed and I post any relevant research I’d post on that cause I don’t want to drown the*  
348 *Facebook group with research because not every parent is on that level”... (P1)*

349

350 Several groups use Twitter to promote research articles relating to their specific area. Groups  
351 acknowledged the importance of research into rare disease, highlighting the need for engagement with  
352 specialists to address the patient’s needs, and the need for awareness raising of research to show the  
353 importance of getting patients involved.

354

355 *“I started to realise that if we get involved at the very beginning, if the idea comes from us*  
356 *about what we need then there’s no this waste of, like so money has been wasted, so much*  
357 *money has been put in to getting 1 drug on the market you know but you really want that to*  
358 *be something that people need that’s going to be better than what already exists”.* (P2)

359

360 Networking and collaborating with other countries was also referred to as an important aspect of  
361 research into rare diseases. Groups acknowledged the difficulties that can be encountered when trying  
362 to get the manpower to look for grants or funding and the money that can be wasted by not involving  
363 patients from the beginning.

364

365 *...“got that networking going em, to try and map what research is going on and they all*  
366 *communicate with each other so if you get a new young clever person who’s interested in*  
367 *doing a bit of research, there’s a bit of guidance as to what needs to be done next, where*  
368 *we’re at and what needs to be done next”. (P5)*

369

#### 370 Theme 6: ‘Not adequate’

371 All of the groups interviewed were in agreement that the services for rare disease patients in Northern  
372 Ireland (and further afield) are not adequate. Figure 5 outlines some of the improvements that were  
373 suggested by survey respondents.

374

375 *...“definitely there could be more done”. (P9)*

376

377 Suggested improvements included: funding organisations such as NIRDP; partnership between  
378 statutory and voluntary services, referrals to groups from health service; share information, network of  
379 people to learn from each other. Some groups highlighted the difficulties newly diagnosed patients face  
380 and how work is needed to make people aware of the kind of help that is available.

381

382 *“...just with a new diagnosis it’s just that initial feeling of where to go but I think once somebody*  
383 *gets into and starts networking, I think the realisation is that there are things out there”. (P3)*

384

385 Groups explained that having health professionals on board with the work the groups are doing helps  
386 to promote their work, raise awareness and achieve more.

387

388           *“You need a champion and that came across very, very strongly at the last rare disease*  
389           *[meeting] in March, you know the all Ireland conference was the groups that had their*  
390           *champions, they were the ones who actually achieved more and you need somebody behind*  
391           *who is totally invested who wants to push things forward”.* (P4)

392  
393 Other suggestions included: connecting with centres of expertise; educating people; better  
394 communication; not duplicating work; involving more experienced people with the social media; better  
395 co-ordination of care; developing an information hub; making people aware that their condition is ‘rare’;  
396 discovering what rare disease patients have in common; listen to patients; smoother access to health  
397 care; more support needed for carers (perhaps in a way that can be accessed remotely). Often respite  
398 is not provided and therefore they cannot attend organised events; awareness raising is needed.

399  
400           *“A big gap continues to be the coordination of care. It continues to be people know knowing*  
401           *where to go, people, healthcare professionals not having confidence in their own abilities.”* (P6)

402  
403           *“...there just isn’t enough resource out there for the sorts of needs that people have...”* (P5)

404  
405 Several ‘novel’ ideas were suggested by the groups as ways to improve or enhance the services already  
406 available for those living with a rare disease. These included an app to enable patients to better manage  
407 their condition, an online map which links to health professionals/support in a specific geographical  
408 area, training on practical issues that are relevant across many rare diseases, the opportunity to join  
409 conferences/events remotely and a ‘rare disease community’. An interesting point was made by one  
410 group that individuals may not know they have a ‘rare disease’ as this terminology may not have been  
411 used to describe their condition making it more difficult for them to find appropriate support.

412  
413 **Discussion**

414 This study aimed to evaluate rare disease resources in Northern Ireland and to identify important issues  
415 for local development. Little research has been conducted to date reviewing dedicated support  
416 available for people with a rare disease and to date no one has reviewed group resources for those

417 with a rare disease. This is particularly challenging where no disease-specific support group exists for  
418 individuals with a named rare disease, or those who are waiting on a diagnosis

419

#### 420 **Communication is an important factor to consider when developing rare disease support**

421 In agreement with previous research, communication was found to be an important factor when  
422 considering support for those with a rare disease [7]. Pelentsov *et al.* (2016) acknowledged how  
423 challenging communication can be for those with a rare disease, particularly those who are newly  
424 diagnosed [25]. Improved communication between General Practitioners (GP) and other healthcare  
425 professionals would help better manage care for patients with rare disease(s). Rare disease registries  
426 are an essential tool to measure the number of people affected by a rare disease(s) and thus contribute  
427 to local evidence-based service planning. Such registries also improve knowledge and monitor  
428 interventions for rare diseases and provide longer-term understanding for a specific disease [26, 27].  
429 The majority of groups in the current study expressed their desire for a rare disease registry to be  
430 established in NI. The disconnect between the health service and groups was mentioned and it was  
431 suggested that a registry may help the health service to be more responsive to rare disease patient's  
432 needs. The development of rare disease registries is growing which is remarkable given the scarcity of  
433 patients [28]. A rare disease registry could be a powerful tool for rare disease patients, enabling long-  
434 term outcomes to be measured and ultimately improving care [29].

435

436 Communication methods need to be considered carefully with particular attention given to equity of  
437 access to good communication tools. All of the groups surveyed or interviewed offer those with a rare  
438 disease various means of communicating from helplines, to social media and websites. Collaborative  
439 groups acknowledged the difficulties that are often experienced when trying to organise face to face  
440 meetings. This is largely due to the nature of rare diseases and the unpredictable symptoms  
441 experienced on a planned date. It seems there is a move away from this type of support towards online  
442 platforms and remote access to in-person / virtual meetings.

443

444 Social isolation is a consistently recurring theme for those with a rare disease, and the internet offers a  
445 practical solution particularly in rural areas [7, 30]. Many of those living with a rare disease find  
446 belonging by being part of an online support group or blog [31]. Although the merits of social media and

447 online support are many, it is important to consider the reality that many people do not regularly access  
448 online services and so there is a chance that people could be missed, as raised by participant 7. The  
449 most common social media platform used by groups was Facebook, followed by Twitter. As in  
450 agreement with Lasker *et al.* (2005) social media was found to be used for 'sharing information about  
451 the specific rare disease' and 'communication with other organisations' [17].

452  
453 100% of groups said they would be interested in collaborating with relevant groups to develop  
454 complementary information resources. This is an idea which should be developed to bring services  
455 together and provide a clear pathway for rare disease patients. Listening to patients was also raised  
456 as an issue in this study by collaborative groups as many patients do not feel the communication  
457 between themselves and health professionals is good enough. Jeppeson *et al.* (2014) also found this,  
458 stating that gaining an insight into how someone copes with the day to day life of living with a rare  
459 disease would enable a deeper understanding and encourage more sympathetic communication [12].  
460 Rare disease patients often experience a shift in their relationship with health professionals as they and  
461 their carers take on the role as the 'experts' [32]. Budysh *et al.* (2012) have shown improved outcomes  
462 will result from care providers recognising and acknowledging patient's expertise and being willing to  
463 partner with them in the decision making around treatment [33]. Many collaborative groups discussed  
464 how having health professionals on board with their work would help to champion and promote what  
465 they do.

466  
467 The NIRDP set out four priorities within their vision as a charity. The first is 'Connecting': Stronger  
468 Together; Outreach to the rare disease community in Northern Ireland; Tackling disadvantage and  
469 inequality; Reaching out to those living and working with rare disease elsewhere in the UK and Ireland,  
470 and across the world [20]. From this element of the charities vision it is apparent that communication  
471 is an important aspect of the work they do within Northern Ireland which supports the need identified  
472 within this project.

473

#### 474 **Training**

475 Effectively supporting those with a rare disease requires training. The majority of groups who were part  
476 of this study are involved with training health care professionals with several having developed/co-



477 ordinated training modules. Although the Northern Ireland Rare Disease Implementation Plan (2015)  
478 attempts to support both GPs and rare disease patients there remains a lack of information among the  
479 GP populations [5, 6]. Greulich *et al.* (2013) among others highlighted the lack of knowledge of general  
480 practitioners on the topic of rare diseases and suggested a web-based module might increase their  
481 knowledge of the specific disease, generic complications (e.g. providing respiratory support is  
482 necessary for multiple rare diseases) and improve patient care [34]. Multiple groups explained that they  
483 organise training days for healthcare professionals and specific disciplines such as physiotherapists,  
484 occupational therapists, hospice staff and unofficial talks and training for schools, teachers and families.  
485 A central online resource listing such events would be beneficial to many people. The UK strategy for  
486 Rare Diseases emphasised the need for improvement of the coordination of care, diagnosis, treatment  
487 and patient empowerment [4].

488  
489 Although plans and initiatives are in place, the GP community still do not feel adequately equipped to  
490 deal with rare disease with many frequently consulting online databases such as Google, Orphanet and  
491 Online Mendelian Inheritance in Man (OMIM) [35]. Fernández Avellaneda *et al.* (2006), investigated  
492 the need for rare disease training in primary care [36]. Difficulties arose in understanding the  
493 importance and magnitude of rare diseases, supporting the findings of the current study that further  
494 training is required. Ramalle-Gomara *et al.* (2014) conducted a survey with 234 students and found  
495 that only around 25% of them knew the definition of rare disease and an orphan drug, again highlighting  
496 the need for training and awareness raising [37, 38]. Further training is needed to appropriately equip  
497 people to support those living with a rare disease [5].

498

#### 499 **Carers**

500 Carers for individuals with a rare disease were frequently discussed - the main issue being that carers  
501 are regularly overlooked and yet they often need support just as much as the person with the rare  
502 disease that they are caring for. Living with a rare disease often involves many appointments and can  
503 include travelling long distances to see specialists or receive treatments and so daily routine can be  
504 disrupted for families [39]. This is particularly challenging in the era of COVID-19 as all hotels and  
505 accommodation options within the UK are closed to everyone except NHS staff; families who normally  
506 stay overnight for complex and / or tiring treatments are unable to do so, thus compromising care and

507 raising inequalities for those living geographically further from treatment centres [40]. For parents of  
508 children with a rare disease, balancing daily life with caring is a frequent problem and often carers  
509 neglect their own needs [41]. It is therefore important as this study suggests that strategies and support  
510 are put in place for carers. Little support is currently provided specifically for carers, it is important that  
511 these individuals are not overlooked.

512

513 Those living with a rare disease face considerable barriers when accessing appropriate care including  
514 delayed diagnosis and limited or non-existing treatment options [42]. The rare disease patient  
515 community has played a critical role, in response to these challenges, elevating patient voice and  
516 mobilising legislation to support the development of programs that address the needs of patients with  
517 rare diseases [42]. For many of the parents of a child with a rare disease, the burden of care spans  
518 many years and involves a lifetime commitment. Parents will require specialist health literacy, care  
519 giving skills and resources beyond those normally required by parents in general [25].

520

521 Rare diseases result in a wide variety of healthcare needs [43]. Rare diseases significantly impact the  
522 economic, psychosocial, and physical well-being of individuals and their family members [39].  
523 Individuals with rare diseases and their family members often have limited evidence-based information  
524 to guide their decisions about disease management and symptom relief [44, 45]. Further, the inherent  
525 uncertainty that comes with having a rare disease, including delays in diagnosis and a lack of knowledge  
526 about current and future care needs, impact access to services and management of the rare disease  
527 [46-48]. Research on the experience of having a rare disease indicates that care and services needs  
528 are often not determined simply by the severity of the health condition, but rather are a combination of  
529 poor quality of care and barriers to access [47, 49]. Baumbusch *et al.* (2019) concluded that informal  
530 peer support from other parents of children with rare diseases were a key resource for parents when  
531 navigating the health care system. Social media was seen as the best way for these people to connect,  
532 giving the best availability [43]. A research study focusing on carers alone would be beneficial for this  
533 cohort to identify their needs and how they can be best supported in this challenging role.

534

535 **Current care/support for those with a rare disease is not adequate.**

536 All collaborative groups interviewed were in agreement that current services for rare disease patients  
537 in Northern Ireland and further afield are not adequate. Ensuring funding is made available to rare  
538 disease collaborative groups was an important factor to consider when developing future services.  
539 Many charities and support services are available to help people with various diseases however 'rare  
540 disease' support is lacking in comparison to cancer and heart patients for example. Pelentsov *et al.*  
541 (2015) outlined the benefits of support groups for those with similar diseases [25]. In agreement with  
542 this study, Taruscio *et al.* (2014) suggested that an accessible one-stop-shop source of information and  
543 support should be an important goal for patients with a rare disease [50]. A reference network 'hub' in  
544 Northern Ireland would bring many benefits.

545  
546 There is a requirement for further research and development in rare diseases in order to meet patients'  
547 medical needs [51]. Within Northern Ireland, the NIRDP has made a commitment to the rare disease  
548 community stating that no one should be disadvantaged because of the rarity of their condition. NIRDP  
549 aim to innovate by developing and implementing improved methods of managing and treating rare  
550 diseases; improving the quality of life for those affected by rare diseases; and increasing the efficiency  
551 and effectiveness of care and support [20]. Some of the ideas for developing and improving rare  
552 disease support suggested by the collaborative support groups included new and innovative ideas as  
553 well as some things that are already being done by other groups: apps for patients to manage their  
554 conditions; online map to link to health professionals/support by geographical area; a hub to co-ordinate  
555 services. It is interesting that access to information for therapies, aids, grants and clinical trials for  
556 example seems to differ a lot from the help and support available to non-disease-specific RD charities  
557 compared to non-disease specific cancer charities. Despite this, many countries have made great  
558 progress in improving processes in the rare disease landscape with patient advocacy playing an  
559 increasing role in shaping discussions and driving the agenda [42]

560  
561 *Strengths and limitations*

562 This study explored an area of very limited published research. The use of an online survey made it  
563 extremely accessible for a wide audience to access remotely. The data collection procedures included  
564 surveys and semi-structured interviews which were promoted online via the NIRDP and QUB; other  
565 methods of dissemination may have helped to generate more respondents/participants. In future

566 research print media and local radio should be considered as options to enhance recruitment. To be  
567 eligible for interview participants had to be English speakers, it is possible that this may have introduced  
568 bias to the sample in that potential participants may have been excluded, but due to the language skills  
569 of the research team this was an essential criterion.

570

## 571 **Conclusion**

572 This study has provided the voluntary sector with an opportunity to share their views and experiences  
573 of the current support available for rare diseases. New insights are added to the existing body of  
574 knowledge on rare disease, highlighting the need for future research including carers and more training  
575 for health professionals regarding communication for rare disease. The surveys and interviews  
576 conducted with rare disease collaborative groups have provided insight into the support available for  
577 rare disease patients in Northern Ireland and have identified the gaps in services. From this information  
578 it has become obvious that many valuable services exist for rare disease patients and that those  
579 providing these are extremely passionate and dedicated to the work that they do. A clear area to target  
580 would be communication, there appears to be a disconnect between statutory and voluntary services  
581 and a better link would improve the care provided for rare disease patients. Access to services for  
582 those who are geographically more distant or are not well enough to attend events is also an area worth  
583 targeting. Perhaps with the increasing use of social media there would be a way to enable this group  
584 to attend and interact with events in a remote way. The current challenges associated with social  
585 distancing to protect individuals who are most clinically vulnerable from COVID-19 provides a valuable  
586 opportunity to review the benefits and limitations of more remote activities in the coming year.

587

588 Communication is key for rare disease support groups, it is important that communication is both  
589 accessible to all and is reciprocated from health professionals. All groups were interested in  
590 collaborating and therefore improving lines of communication and enabling opportunities for  
591 collaboration could help greatly in developing and improving services. There were also pleas for a local  
592 rare disease 'registry'. Social media was used widely within the groups that were part of this study  
593 although it was noted that various difficulties can arise when trying to maintain these accounts. Every  
594 group made suggestions as to how they feel services and support could be improved for those with a  
595 rare disease, many of these ideas centred on communication as well as increasing resources. The fact

596 that carers are not often catered for specifically by these groups is something needs to be addressed  
597 as it was highlighted that in most cases it is the family member or carer who makes the initial contact  
598 with the group. The struggle to get health professionals on board was acknowledged. There was an  
599 agreed consensus that the services for rare disease patients in Northern Ireland are not adequate.

600

601 Further research should be conducted with rare disease collaborative groups, specifically it would  
602 interesting to get the views of those accessing these services. Research focusing on carers would also  
603 be useful as to date no research studies focus solely on them. Interestingly, many studies have been  
604 conducted on carers for cancer [52, 53, 54]. The lack of research suggests that a difference exists  
605 between cancer caring support options and those for rare disease patients. Families living with rare  
606 diseases have traditionally received little attention from health authorities, clinicians and researchers  
607 [44]. Given the unique and close relationship carers often have with rare disease patient(s) it is crucial  
608 that they are included in future research.

609

610 Locally and internationally it is important to build upon existing support and move towards a brighter  
611 future for those with a rare disease. Additional file 8 shows the recommendations to inform health  
612 care policy and practice

613

## 614 **Methods**

615 In this study, an evaluation was conducted of the awareness of rare diseases, related information, and  
616 educational resources available for patients, their families and healthcare professionals across Northern  
617 Ireland. A primarily qualitative approach was chosen for this study as the aim was to explore the current  
618 services provided by rare disease collaborative groups across Northern Ireland by gaining the views  
619 and perceptions of individuals who work/volunteer for them. Qualitative research aims to understand  
620 behaviour and beliefs, identify processes and to understand the context of people's experiences [55].

621 In this study data were collected from a relatively small population group but findings may be applicable  
622 for a wider population due to the common challenges and specific needs of those with a rare disease.

623

624 The study had two stages:

625

- 626 - *Stage 1: Online survey with rare disease collaborative groups in Northern Ireland.*
- 627 - *Stage 2: Semi-structured interviews with rare disease collaborative groups in Northern Ireland.*

628

629 The survey and interviews were used to help evaluate awareness of rare diseases, alongside related  
630 information and educational resources available for patients, their families and healthcare professionals  
631 in Northern Ireland. They were conducted as part of the evaluation phase of key priorities for action in  
632 the *Northern Ireland Rare Disease Implementation Plan* [5]. Results were collated anonymously and  
633 used to help improve the accessibility of resources and address the needs of individuals affected by  
634 rare disease(s) in Northern Ireland. Through the surveys and interviews we wanted to locate existing  
635 resources as well as identify gaps where the development of further resources would be appropriate.

636

### 637 **Stage 1: Online surveys**

638 A survey was constructed using an iterative approach with input from patient and healthcare  
639 professional representatives from the Northern Ireland Rare Disease Partnership (NIRDP, the national  
640 charity for rare diseases in Northern Ireland) [20] and was uploaded onto SmartSurvey [56]. The survey  
641 was also promoted on by the NIRDP (Twitter, @NI\_RDP, 1,167 followers; Facebook, @NIRDPNews,  
642 952 members) and QUB through their websites and associated social media platforms beginning early  
643 2018. Further dissemination occurred by individuals, member charities, and voluntary groups; there  
644 was not a mechanism available to track the reach of this extended dissemination. Collaborative rare  
645 disease groups that were member charities of NIRDP or had engaged with previous research by our  
646 team [57] with consent for recontact were contacted directly to alert them to the survey and interview  
647 invitations. Potential participants who expressed an interest were then sent an email with a cover letter  
648 (including a link to the survey) and a participant information sheet, which informed them of the purpose  
649 of the study and guidance on how to complete the survey.

650

651 The survey was opened early 2018 for a period of 3 months. Each section in the survey contained  
652 closed and open-ended questions and were displayed with the option to save and return at a later date.  
653 Question four of the survey asked participants for permission to be contacted for follow-up questions  
654 *via* an interview which aided recruitment for the next stage of the study. SmartSurvey was used to  
655 generate tables and charts to add demographic and statistical information to this study [56].

656

## 657 **Interviews**

658 Semi-structured interviews were chosen for this study as they allow the interviewer to conduct the  
659 conversation using their own words and are most commonly associated with the collection of qualitative  
660 social data when the researcher is interested in people's experience [58, 59]. An interview schedule  
661 was used which helps the researcher to conduct the interview by outlining what will be explored while  
662 allowing flexibility for details that are unique to each participant [60]. As there have been few previous  
663 qualitative studies undertaken in this area, the interview schedule was designed specifically for this  
664 study with the aim and objectives guiding the questions with input from the NIRDP.

665

666 A total of 36 emails were sent to rare disease collaborative groups across Northern Ireland with a  
667 covering letter and a participant information sheet which provided details of the purpose of the study  
668 and explained what they would have to do should they agree to take part. Reminder emails were sent  
669 out one week after the initial email had been sent.

670

671 A total of nine collaborative groups agreed to be interviewed (25% of those contacted) within the  
672 timeframe of this study. Data collection for interviews took place between July 2018 and May 2019 in  
673 a neutral location. Informed consent was obtained prior to each interview taking place, which included  
674 permission to record the interview on a digital recorder. The interview schedule provided a loose  
675 framework to encourage ideas from the participants. Probes were used in response to the information  
676 provided by participants.

677

678 Each interview was transcribed verbatim by the interviewing researchers (JM & AC) as soon as possible  
679 to maximise the accuracy of the transcription process; interview transcripts were uploaded to NVivo12  
680 software for analysis [61] to describe, discuss, evaluate and explain the content and characteristics of  
681 the data that has been collected [62]. Working with qualitative data involves gaining an understanding  
682 of the words, stories, accounts and explanations of the participants [63]. Comparing the data from each  
683 transcript allowed for meanings to be explored within the data and for the identification of relationships  
684 between different parts of the data and for the provision of explanations for the similarities or differences  
685 found [64]. The data was analysed using Thematic Analysis [24].

686

687 **List of abbreviations**

688 ECHO Extension for Community Healthcare Outcomes

689 GP General Practitioner

690 HCP Health care personnel

691 NI Northern Ireland

692 NIRDP Northern Ireland Rare Disease Partnership

693 OMIM Online Mendelian Inheritance in Man

694 QUB Queen's University, Belfast

695 RD Rare disease

696 UK United Kingdom

697

698 **Declarations**

699

700 • **Ethics approval and consent to participate:**

701 This study has ethical approval from QUB's School of Medicine, Dentistry and Biomedical  
702 Sciences research ethics committee, Northern Ireland. Consent to take part in the survey was  
703 explicitly given by all participants by actively ticking a 'consent box' before they could proceed  
704 with the online survey. Consent for the interviews was collected *via* a hard copy form which  
705 was signed by the participant.

706 • **Consent for publication:** Not applicable.

707 • **Availability of data and material:** The datasets generated and/or analysed during the current  
708 study are not publicly available due as they contain potentially identifiable information but are  
709 available from the corresponding author on reasonable request.

710 • **Competing interests:** The authors have no competing interests to declare. AJM is a former  
711 board member and HM an existing board member of the NIRDP.

712 • **Funding:** JM was supported by an award from the NI Public Health Agency and the Medical  
713 Research Council – Northern Ireland Executive support of the Northern Ireland Genomic  
714 Medicine Centre through Belfast Health and Social Care Trust. AC and CB are recipients of



715 PhD studentships from the Department for the Economy NI. KM is supported by an award from  
716 the Rank Foundation.

717 • **Authors' contributions:** AJM conceived of the project, designed the survey with input from  
718 patients, healthcare professionals and voluntary groups, and drafted the manuscript. JM  
719 collected the survey and interview data, analysed the data, and drafted the manuscript. AC,  
720 CB, LM and NS helped with data collection. All authors contributed to data interpretation,  
721 manuscript revision and agreed the final version for submission.

722 • **Acknowledgements:** We thank all individuals and groups who participated in this study. We  
723 also thank NIRDP ([www.nirdp.org.uk](http://www.nirdp.org.uk)) and QUB ([https://www.qub.ac.uk/research-](https://www.qub.ac.uk/research-centres/CentreforPublicHealth/)  
724 [centres/CentreforPublicHealth/](https://www.qub.ac.uk/research-centres/CentreforPublicHealth/)) for helping promote the study.

725

## 726 References

727

- 728 1. European Union. Regulation (EC) N°141/2000 of the European Parliament and of the Council  
729 of 16 December 1999 on orphan medicinal  
730 products.[http://eurlex.europa.eu/LexUriServ/LexUriServ.do?uri=OJ:L:2000:018:0001:0005:EN](http://eurlex.europa.eu/LexUriServ/LexUriServ.do?uri=OJ:L:2000:018:0001:0005:EN:PDF)  
731 [:PDF](http://eurlex.europa.eu/LexUriServ/LexUriServ.do?uri=OJ:L:2000:018:0001:0005:EN:PDF). Accessed 24 April 2020.
- 732 2. McKnight A.J., McMullan J, Walker R, & Collins C., Communications and Information Review:  
733 NI Report for Rare Diseases, (2020, Jan 31).
- 734 3. McMullan J, Crowe A, Kerr K, Bailie C, McAneney H, McLaughlin F, Collins C, McKnight A.J.  
735 Perspectives on a NI Rare Disease Registry, (2020, Jan 31).
- 736 4. Department of Health. The UK Strategy for Rare Diseases. (2013). Available online at  
737 [https://assets.publishing.service.gov.uk/government/uploads/system/uploads/attachment\\_data/](https://assets.publishing.service.gov.uk/government/uploads/system/uploads/attachment_data/file/260562/UK_Strategy_for_Rare_Diseases.pdf)  
738 [file/260562/UK\\_Strategy\\_for\\_Rare\\_Diseases.pdf](https://assets.publishing.service.gov.uk/government/uploads/system/uploads/attachment_data/file/260562/UK_Strategy_for_Rare_Diseases.pdf). Accessed May 1, 2020.
- 739 5. Providing High Quality Care for people affected by Rare Diseases-The Northern Ireland  
740 Implementation Plan for Rare Diseases. 2015. [https://www.health-](https://www.health-ni.gov.uk/sites/default/files/publications/dhssps/ni-rare-diseases-implementation-plan-oct-2015.pdf)  
741 [ni.gov.uk/sites/default/files/publications/dhssps/ni-rare-diseases-implementation-plan-oct-](https://www.health-ni.gov.uk/sites/default/files/publications/dhssps/ni-rare-diseases-implementation-plan-oct-2015.pdf)  
742 [2015.pdf](https://www.health-ni.gov.uk/sites/default/files/publications/dhssps/ni-rare-diseases-implementation-plan-oct-2015.pdf). Accessed 3 Feb 2020.
- 743 6. Crowe A, McAneney H., Morrison P., Cupples M. & McKnight, A, 2020., A quick reference  
744 guide for rare disease: supporting rare disease management in general practice, British  
745 Journal of General Practice. 70, 694: 260-261.
- 746 7. Crowe A., McKnight A. & McAneney, H.m Communication needs for individuals with rare  
747 diseases within and around the healthcare system of Northern Ireland, In : Frontiers in public  
748 health. 21 Aug 2019.
- 749 8. McAneney H., Crowe A., Millar J., Kerr K., McMullan J., & McKnight A. J., Improving rare  
750 disease identification and coordinating health and social care priorities. *European Journal of*  
751 *Human Genetics*, 27, 2019 [P19.39C].
- 752 9. Crowe A., McAneney H., McMullan J., & McKnight A. Improving communication for individuals  
753 with a rare condition. *European Journal of Human Genetics*, 2019; 27, 696-697.
- 754 10. McKnight A. J. Recommendation for a Collaborative Centre of Expertise for Rare Diseases in  
755 Northern Ireland (CERDNI). [https://pure.qub.ac.uk/en/publications/recommendation-for-a-](https://pure.qub.ac.uk/en/publications/recommendation-for-a-collaborative-centre-of-expertise-for-rare-d)  
756 [collaborative-centre-of-expertise-for-rare-d](https://pure.qub.ac.uk/en/publications/recommendation-for-a-collaborative-centre-of-expertise-for-rare-d) (2013, Sep 30).
- 757 11. Elliott E.J., Zuryski YA., Rare diseases are a 'common' problem for clinicians, *Australian Family*  
758 *Physician*; 2015; 44(9):630-633.
- 759 12. Jeppesen J., Rahbek J., Gredal O., and Hansen, H.P. How narrative journalistic stories can  
760 communicate the individual's challenges of daily living with Amyotrophic Lateral Sclerosis,  
761 *Patient*. 2014; 8:41–9.

- 762 13. Lopes M.T., Koch V.H., Sarrubbi-Junior V, Gallo P.R., Carneiro-Sampaio M., Difficulties in the  
763 diagnosis and treatment of rare diseases according to the perceptions of patients, relatives  
764 and health care professionals, *Clinics*. 2018; 73: e68
- 765 14. Roo M., López Martin E., Wilkinson M.D. (2017) Preparing Data at the Source to Foster  
766 Interoperability across Rare Disease Resources. In: Posada de la Paz M., Taruscio D.,  
767 Groft S. (eds) *Rare Diseases Epidemiology: Update and Overview. Advances in*  
768 *Experimental Medicine and Biology*, vol 1031. Springer, Cham 18 *Nat Rev Genet*. 2018  
769 May;19(5):253-268. doi: 10.1038/nrg.2017.116. Epub 2018 Feb 5 *Paediatric genomics:*  
770 *diagnosing rare disease in children.* Wright CF<sup>1</sup>, FitzPatrick DR<sup>2</sup>, Firth HV<sup>3,4</sup>.
- 771 15. Eurodis, Rare diseases Europe. <https://www.eurordis.org/> Accessed 30 April 2020.
- 772 16. Beall J, Internet Resources in Rare Diseases, *Health Care on the Internet*, 2001 5:4.
- 773 17. Lasker JN, Sogolow ED, Sharim RR The Role of an Online Community for People With a  
774 Rare Disease: Content Analysis of Messages Posted on a Primary Biliary Cirrhosis Mailinglist  
775 *J Med Internet Res* 2005;7(1):e10
- 776 18. Global Genes, Allies in Rare Disease. [www.globalgenes.org](http://www.globalgenes.org) Accessed 1 May 2020.
- 777 19. Rare Disease UK. <https://www.rare-disease.org.uk/> Accessed 1 May 2020.
- 778 20. Northern Ireland Rare Disease Partnership. <https://www.nirdp.org.uk> Accessed 24 April 2020.
- 779 21. Cancer Research UK. [www.cancerresearchuk.org](http://www.cancerresearchuk.org). Accessed 25 April 2020.
- 780 22. British Heart Foundation. <https://www.bhf.org.uk/> Accessed 25 April 2020.
- 781 23. NHS England <https://www.england.nhs.uk/tis/>) Accessed 23 April 2020
- 782 24. Braun V. and Clarke V. Using thematic analysis in psychology. *Qualitative Research in*  
783 *Psychology*, 2006. 3 (2), 77.
- 784 25. Pelentsov LJ., Laws TA., Esterman AJ., The supportive care needs of parents caring for a child  
785 with a rare disease: A scoping review. *Disabil Health J*. 2015; 8(4):475–91.
- 786 26. Bellgard M., Beroud C., Parkinson K., Harris T., Ayme S., Baynam G., Weeramanthri T.,  
787 Dawkins H. and Hunter A., Dispelling myths about rare disease registry system development,  
788 *Source Code for Biology and Medicine*, 2013, 8:21.
- 789 27. Bilton D., Caine N., Cunningham S., Simmonds N.J., Costgriff R. and Carr S.B., Use of a rare  
790 disease patient registry in long-term post-authorisation drug studies: a model for collaboration  
791 with industry, *The Lancet Respiratory Medicine*, 2018 6: (7); 495-496.
- 792 28. Kodra Y., Weinbach J., Posada-de-la-Paz M., Coi A., Lydie Lemonnier S., van Enckevort D.,  
793 Roos M., Jacobsen A., Cornet R., Faisal Ahmed S., Bros-Facer V., Popa V., Van Meel M.,  
794 Renault D., von Gizycki R., Santoro M., Landais P., Torrer P, Carta C., Mascalconi D., Gainotti  
795 S., Lopez. E., Ambrosini. A, Müller H., Reis R., Bianchi F., Rubinstein Y.R., Lochmüller H.,  
796 Taruscio, D., Recommendations for Improving the Quality of Rare Disease Registries,  
797 *International Journal of Environmental Research and Public Health*, 2018;15, 1644.
- 798 29. Lacasse Y, Krishnan JA, Maltais F, Ekström M. Patient registries for home oxygen research  
799 and evaluation. *Int J Chron Obstruct Pulmon Dis*. 2019;14:1299-1304  
800 <https://doi-org.queens.ezp1.qub.ac.uk/10.2147/COPD.S204391>).
- 801 30. McKnight, A.J. (2015); Living every day with a rare disease.
- 802 31. Glenn AD., Using Online Health Communication to Manage Chronic Sorrow: Mothers of  
803 Children with Rare Diseases Speak *Journal of Pediatric Nursing*, 2015; 30, 17-24.
- 804 32. Badiu C., Bonomi M., Borshchevsky I., Cools M., Craen M., Ghervan C., Hauschild M.,  
805 Hershkovitz E., Hrabovszky E., Juul A., Kim S-H., Kumanov P., Lecumberri B., Lemos M.C.,  
806 Neocleous V., Niedziela M., Djurdjevic SP., Persani L., Phan-Hug F., Pignatelli D., Pitteloud N.,  
807 Popovic V., Quinton R., Skordis N., Smith N., Stefanija MA., Xu C., Young J., Dwyer AA.,  
808 Developing and evaluating rare disease educational materials co-created by expert clinicians  
809 and patients: the paradigm of congenital hypogonadotropic hypogonadism, *Orphanet Journal*  
810 *of Rare Diseases*. 2017; 12:57.
- 811 33. Budyk K, Helms TM , Schultz C, How do patients with rare diseases experience the medical  
812 encounter? Exploring role behavior and its impact on patient-physician interaction, *Health*  
813 *Policy*. 2012; 105(2-3):154-164.
- 814 34. Greulich, T., Ottaviani, S., Bals, R., Lepper, P.M., Vogelmeier, C., Luisetti, M., Alpha1-  
815 antitrypsin deficiency - Diagnostic testing and disease awareness in Germany and Italy. *Respir*  
816 *Med*. 2013; 107:1400–8.
- 817 35. Stoller JK., The Challenge of Rare Diseases, *Chest*. 2018; 153(6):1309–14.
- 818 36. Avellaneda Fernández A., Izquierdo Martínez M., Luengo Gómez S., Arenas Martín J., Ramón  
819 JR., Need for primary care training in rare diseases. *Aten primaria*. 2006; 38(6):345–8.

- 820 37. Ramalle-Gómara E., Ruiz E., Quiñones C., Andrés S., Iruzubieta J., Gil-de-Gómez J., General  
821 knowledge and opinion of future health care and non-health care professionals on rare  
822 diseases., *J Eval Clin Pract.* 2015;21(2):198–201.
- 823 38. Ramalle-Gómara, E., Domínguez-Garrido, E., Gómez-Eguílaz, M. *et al.* Education and  
824 information needs for physicians about rare diseases in Spain. *Orphanet J Rare Dis* **15**, 18  
825 (2020). <https://doi.org/10.1186/s13023-019-1285-0>
- 826 39. Zurynski Y., Frith K., Leonard H., Elliott E., Rare childhood diseases: how should we respond?,  
827 *Arch Dis Child.* 2008;1;93(12):1071.
- 828 40. Covid19 Advice for accommodation providers, Available online at:  
829 <https://www.gov.uk/guidance/covid-19-advice-for-accommodation-providers>. Accessed 14  
830 May 2020.
- 831 41. Etchegary H., Healthcare experiences of families affected by Huntington disease: need for  
832 improved care, *Chronic Illn.* 2011, 20;7(3):225–38.
- 833 42. Dharssi S., Wong-Rieger D., Harold M. and Terry S., Review of 11 national policies for rare  
834 diseases in the context of key patient needs *Orphanet Journal of Rare Diseases.* 2017;12:63.
- 835 43. Baumbusch J., Mayer S., Sloan-Yip I, Alone in a Crowd? Parents of Children with Rare  
836 Diseases' Experiences of Navigating the Healthcare System, *Journal of Genetic Counseling.*  
837 2019; 28:80-90.
- 838 44. Anderson M., Elliott E.J., Zurynski YA.. Australian families living with rare disease: experiences  
839 of diagnosis, health services use and needs for psychosocial support. 2013. *Orphanet J Rare*  
840 *Dis* ;8(1):22.
- 841 45. Forsythe LP., Szydowski V., Murad MH., Ip S., Wang Z., Elraiyah TA., A systematic review of  
842 approaches for en-gaging patients for research on rare diseases, *Journal of General Internal*  
843 *Medicine*, 2014; 29(S3), 788–800.
- 844 46. Grut L. & Kvam MH., Facing ignorance: people with rare disorders and their experiences with  
845 public health and welfare services. *Scandinavian Journal of Disability Research*, 2013; 15(1),  
846 20–32.
- 847 47. Huyard C., What, if anything, is specific about having a rare disorder? Patients' judgements on  
848 being ill and being rare. *Health Expectations*, 2009; 12(4), 361–370.
- 849 48. Dellve L., Samuelsson L., Tallborn A., Fasth A., & Hallberg LRM., Stress and well-being among  
850 parents of children with rare diseases: a prospective intervention study, *Journal of Advanced*  
851 *Nursing*, 2006; 53(4) 392–402.
- 852 49. Farmer JE., Marien WE., Clark MJ., Sherman A., & Selva TJ., Primary care supports for children  
853 with chronic health conditions: identifying and predicting unmet family needs. *Journal of*  
854 *Pediatric Psychology*. 2004; 29(5), 355–367.
- 855 50. Taruscio D., Arriola L., Baldi F., Barisic I., Bermejo-Sanchez E., Bianchi F., Calzolari E.,  
856 Carbone P., Curran R., Garne E., Gatt M., Latos-Bielenska A., Khoshnood B., Irgens L.,  
857 Mantovani A., Martinez-Frias ML., Neville A., Ribmann A., Ruggeri S., Wellesley D., Dolk D.,  
858 European Recommendations for Primary Prevention of Congenital Anomalies: A Joined Effort  
859 of EUROCAT and EUROPLAN Projects to Facilitate Inclusion of This Topic in the National Rare  
860 Disease Plans, *Public Health Genomics.* 2014; 17:115-123.
- 861 51. Rodwell C. and Ayme S., Rare disease policies to improve care for patients in Europe,  
862 *Biochimica Biophys Acta.* 2015;1852 (10Pt B):2329-35.
- 863 52. Wheelwright S., Darlington A-S., Hopkinson J.B., Fitzsimmons D. and Johnson C., A systematic  
864 review and thematic synthesis of quality of life in the informal carers of cancer patients with  
865 cachexia, *Palliative Medicine*, 2015; 30; 2.
- 866 53. Santin O, McShane T., Hudson P. and Prue G., Using a six-step co-design model to develop  
867 and test a peer-led web-based resource (PLWR) to support informal carers of cancer patients,  
868 *Psycho-Oncology*, 2018; 28; 3.
- 869 54. Katende G., Nakimera L., (2017), Prevalence and correlates of anxiety and depression among  
870 family carers of cancer patients in a cancer care and treatment facility in Uganda: a cross-  
871 sectional study, 17; 3.
- 872 55. Strauss AL and Corbin J. *Basics of Qualitative Research*, 3<sup>rd</sup> edition, London Sage, 2008. p31-  
873 34
- 874 56. SmartSurvey. [www.smartsurvey.co.uk](http://www.smartsurvey.co.uk). Accessed 06 May 2020.
- 875 57. Queen's University, Belfast, Rare Disease webpage.  
876 <https://www.qub.ac.uk/sites/RareDisease/> Accessed 28 April 2020.
- 877 58. Bryman A. *Social Research Methods*, 4<sup>th</sup> Edition, Oxford, Oxford University Press, 2012. p405-  
878 406.

- 879 59. Ritchie J, Lewis J, McNaughton, Nicholls C and Ormston R. (eds) Qualitative Research Practice  
880 – A Guide for Social Science Students and Researchers, London, Sage Publications. 2014 p4-  
881 6.  
882 60. Marshall C. and Rossman GB. Designing Qualitative Research, 6<sup>th</sup> Edition, London, Sage  
883 Publications Ltd, 2016. p147-155.  
884 61. NVIVO <https://www.qsrinternational.com/nvivo-qualitative-data-analysis-software/home>  
885 Accessed 1 May 2020.  
886 62. Silverman D. Interpreting Qualitative Data, 3<sup>rd</sup> Edition, London, Sage, 2006. p76-78  
887 63. McQueen R., and Knussen C. Research Methods for Social Science, An introduction, Essex,  
888 Prentice Hall, 2002, p200-201.  
889 64. Wertz FJ., Charmaz K., McMullen L.M., Josselson R., Anderson R. and McSpadden E. Five  
890 Ways of Doing Qualitative Analysis, New York, The Guilford Press, 2011, p58-59.  
891  
892

### 893 **Additional files**

#### 894 *Additional file 1*

- 895 • Survey template
- 896 • PDF

897

#### 898 *Additional file 2*

- 899 • Detailed survey responses
- 900 • MS Word

901

#### 902 *Additional file 3*

- 903 • Supportive networking options provided by rare disease collaborative groups to help connect  
904 people
- 905 • MS Word

906

#### 907 *Additional file 4*

- 908 • Top purposes of social media platforms and most popular information offered on websites.
- 909 • MS Word

910

#### 911 *Additional file 5*

- 912 • Social media use by rare disease collaborative groups
- 913 • MS Word

914

#### 915 *Additional file 6*

- 916 • Distribution of 'registry' data
- 917 • MS Word

918

#### 919 *Additional file 7*

- 920 • How information and communication could be improved within and beyond rare disease  
921 collaborative groups.
- 922 • MS Word

923

#### 924 *Additional file 8*

- 925 • Recommendations to inform health care policy and practice
- 926 • MS Word

927
